# Supplementary material
Source: HighWire-hosted journal article supplement (https://bmjopen.bmj.com/content/12/3/e053943)
Supplement: inline-supplementary-material-1 [file inline-supplementary-material-1.pdf]

## Prescribing of antipsychotics among people with recorded Personality Disorder in primary care: a retrospective nationwide cohort study using The Health Improvement Network primary care database

Sarah L Hardoon<sup>1</sup>, Joe F Hayes<sup>1,2</sup>, Essi Viding<sup>3</sup>, Eamon McCrory<sup>3,4</sup>, Kate Walters<sup>5</sup>, David PJ Osborn<sup>1,2</sup>

1 Division of Psychiatry, UCL, UK

2 Camden and Islington NHS Foundation Trust, UK

3 Division of Psychology and Language Sciences, UCL, UK

4 Anna Freud National Centre for Children and Families, UK

5 Department of Primary Care & Population Health, UCL, UK

### Supplementary material

#### Appendix

##### Appendix Table 1 Read codes for personality disorder

| Read code | Description                                    | ICD-10 diagnostic category of PD | N*    | %     |
|-----------|------------------------------------------------|----------------------------------|-------|-------|
| E21..00   | Personality disorders                          | other or non-specific            | 14321 | 30.99 |
| E21y200   | Borderline personality disorder                | emotionally unstable             | 4926  | 10.66 |
| E21z.00   | Personality disorder NOS                       | other or non-specific            | 4676  | 10.12 |
| E215200   | Emotionally unstable personality               | emotionally unstable             | 3477  | 7.52  |
| E214100   | Obsessional personality                        | anankastic                       | 2564  | 5.55  |
| Eu60300   | [X]Emotionally unstable personality disorder   | emotionally unstable             | 1988  | 4.30  |
| E210.00   | Paranoid personality disorder                  | paranoid                         | 1760  | 3.81  |
| E216.00   | Inadequate personality disorder                | dependent                        | 1282  | 2.77  |
| E212.00   | Schizoid personality disorder                  | schizoid                         | 998   | 2.16  |
| E216.13   | Labile personality                             | dependent                        | 752   | 1.63  |
| E21z.11   | Psychopathic personality                       | dissocial                        | 722   | 1.56  |
| E21y500   | Immature personality disorder                  | other or non-specific            | 605   | 1.31  |
| E213.00   | Explosive personality disorder                 | emotionally unstable             | 555   | 1.20  |
| E215.11   | Hysterical personality disorders               | histrionic                       | 531   | 1.15  |
| E217.00   | Antisocial or sociopathic personality disorder | dissocial                        | 455   | 0.98  |
| Eu60200   | [X]Dissocial personality disorder              | dissocial                        | 411   | 0.89  |
| Eu60z00   | [X]Personality disorder, unspecified           | other or non-specific            | 374   | 0.81  |
| E215.00   | Histrionic personality disorders               | histrionic                       | 369   | 0.80  |
| E21y711   | Neurotic personality                           | other or non-specific            | 357   | 0.77  |
| E21yz00   | Other personality disorder NOS                 | other or non-specific            | 352   | 0.76  |
| Eu60600   | [X]Anxious [avoidant] personality disorder     | anxious                          | 337   | 0.73  |
| Eu60212   | [X]Antisocial personality disorder             | dissocial                        | 326   | 0.71  |
| Eu60512   | [X]Obsessional personality disorder            | anankastic                       | 301   | 0.65  |
| E214.00   | Compulsive personality disorders               | anankastic                       | 249   | 0.54  |
| Eu61.00   | [X]Mixed and other personality disorders       | other or non-specific            | 239   | 0.52  |
| E216.12   | Dependent personality                          | dependent                        | 238   | 0.51  |
| Eu60700   | [X]Dependent personality disorder              | dependent                        | 229   | 0.50  |
| E21y700   | Psychoneurotic personality disorder            | other or non-specific            | 210   | 0.45  |
| Eu60513   | [X]Obsessive-compulsive personality disorder   | anankastic                       | 206   | 0.45  |
| Eu60311   | [X]Aggressive personality disorder             | emotionally unstable             | 205   | 0.44  |
| E21y.00   | Other personality disorders                    | other or non-specific            | 204   | 0.44  |
| Eu60312   | [X]Borderline personality disorder             | emotionally unstable             | 176   | 0.38  |

|         |                                             |                       |     |       |
|---------|---------------------------------------------|-----------------------|-----|-------|
| Eu60214 | [X]Psychopathic personality disorder        | dissocial             | 158 | 0.34  |
| E21y100 | Avoidant personality disorder               | anxious               | 145 | 0.31  |
| E212z00 | Schizoid personality disorder NOS           | schizoid              | 126 | 0.27  |
| Eu60411 | [X]Hysterical personality disorder          | histrionic            | 123 | 0.27  |
| Eu60100 | [X]Schizoid personality disorder            | schizoid              | 122 | 0.26  |
| E21y000 | Narcissistic personality disorder           | other or non-specific | 111 | 0.24  |
| Eu60000 | [X]Paranoid personality disorder            | paranoid              | 110 | 0.24  |
| Eu60215 | [X]Sociopathic personality disorder         | dissocial             | 110 | 0.24  |
| E214000 | Anankastic personality                      | anankastic            | 106 | 0.23  |
| E21..11 | Neurotic personality disorder               | other or non-specific | 80  | 0.17  |
| E21y400 | Eccentric personality disorder              | other or non-specific | 64  | 0.14  |
| Eu60500 | [X]Anankastic personality disorder          | anankastic            | 57  | 0.12  |
| E214z00 | Compulsive personality disorder NOS         | anankastic            | 52  | 0.11  |
| Eu60712 | [X]Inadequate personality disorder          | dependent             | 39  | 0.08  |
| Eu60400 | [X]Histrionic personality disorder          | histrionic            | 37  | 0.08  |
| E215z00 | Histrionic personality disorder NOS         | histrionic            | 35  | 0.08  |
| Eu60y13 | [X]Immature personality disorder            | other or non-specific | 35  | 0.08  |
| Eu60014 | [X]Sensitive paranoid personality disorder  | paranoid              | 33  | 0.07  |
| Eu60511 | [X]Compulsive personality disorder          | anankastic            | 27  | 0.06  |
| Eu60.00 | [X]Specific personality disorders           | other or non-specific | 27  | 0.06  |
| E212000 | Unspecified schizoid personality disorder   | schizoid              | 26  | 0.06  |
| Eu60z12 | [X]Pathological personality NOS             | other or non-specific | 22  | 0.05  |
| Eu60y00 | [X]Other specific personality disorders     | other or non-specific | 21  | 0.05  |
| E215000 | Unspecified histrionic personality disorder | histrionic            | 20  | 0.04  |
| E216.11 | Asthenic personality                        | dependent             | 20  | 0.04  |
| E21y300 | Passive-aggressive personality disorder     | other or non-specific | 20  | 0.04  |
| Eu60y16 | [X]Psychoneurotic personality disorder      | other or non-specific | 17  | 0.04  |
| E214.11 | Anankastic personality                      | anankastic            | 11  | 0.02  |
| Eu60713 | [X]Passive personality disorder             | dependent             | 11  | 0.02  |
| Eu60313 | [X]Explosive personality disorder           | emotionally unstable  | 10  | 0.02  |
| Eu60z11 | [X]Character neurosis NOS                   | other or non-specific | 10  | 0.02  |
| Eu60711 | [X]Asthenic personality disorder            | dependent             | 9   | 0.02  |
| Eu60y14 | [X]Narcissistic personality disorder        | other or non-specific | 8   | 0.02  |
| Eu60y11 | [X]Eccentric personality disorder           | other or non-specific | 6   | 0.01  |
| Eu60714 | [X]Self defeating personality disorder      | dependent             | 4   | 0.01  |
| Eu60213 | [X]Asocial personality disorder             | dissocial             | 3   | 0.01  |
| E21y600 | Masochistic personality disorder            | other or non-specific | 3   | 0.01  |
| E217.11 | Amoral personality                          | dissocial             | 2   | <0.01 |
| E215300 | Psychoinfantile personality                 | histrionic            | 1   | <0.01 |
| Eu60412 | [X]Psychoinfantile personality disorder     | histrionic            | 1   | <0.01 |
| Eu60y12 | [X]Haltlose type personality disorder       | other or non-specific | 1   | <0.01 |
| E210.11 | Fanatic personality                         | paranoid              | 0   | 0     |
| Eu60011 | [X]Expansive paranoid personality disorder  | paranoid              | 0   | 0     |
| Eu60012 | [X]Fanatic paranoid personality disorder    | paranoid              | 0   | 0     |
| Eu60013 | [X]Querulant personality disorder           | paranoid              | 0   | 0     |
| Eu60211 | [X]Amoral personality disorder              | dissocial             | 0   | 0     |
| Eu60y15 | [X]Passive-aggressive personality disorder  | other or non-specific | 0   | 0     |

\*N = number in cohort with the Read code as their most recent specific Read code for PD, unless individual had only non-specific Read codes, in which case, instead it is the most recent non-specific Read code.

**Appendix Table 2 Types of antipsychotics prescribed**

|                 | Typical (T) or Atypical (A) | All prescribed antipsychotics, n = 15562 |        | Prescribed antipsychotics, SMI, n = 6354 |        | All prescribed antipsychotics, no SMI, n = 9208 |        |
|-----------------|-----------------------------|------------------------------------------|--------|------------------------------------------|--------|-------------------------------------------------|--------|
|                 |                             | N                                        | (%)    | N                                        | (%)    | N                                               | (%)    |
| Atypical        |                             | 12007                                    | (77.2) | 5370                                     | (84.5) | 6637                                            | (72.1) |
| Typical         |                             | 6688                                     | (43.0) | 2756                                     | (43.4) | 3932                                            | (42.7) |
| QUETIAPINE      | A                           | 5819                                     | (37.4) | 2162                                     | (34.0) | 3657                                            | (39.7) |
| OLANZAPINE      | A                           | 4269                                     | (27.4) | 2344                                     | (36.9) | 1925                                            | (20.9) |
| RISPERIDONE     | A                           | 3399                                     | (21.8) | 1739                                     | (27.4) | 1660                                            | (18.0) |
| CHLORPROMAZINE  | T                           | 2426                                     | (15.6) | 968                                      | (15.2) | 1458                                            | (15.8) |
| ARIPIRAZOLE     | A                           | 1728                                     | (11.1) | 1015                                     | (16.0) | 713                                             | (7.7)  |
| HALOPERIDOL     | T                           | 1298                                     | (8.3)  | 606                                      | (9.5)  | 692                                             | (7.5)  |
| FLUPENTIXOL     | T                           | 1041                                     | (6.7)  | 459                                      | (7.2)  | 582                                             | (6.3)  |
| TRIFLUOPERAZINE | T                           | 951                                      | (6.1)  | 407                                      | (6.4)  | 544                                             | (5.9)  |
| AMISULPRIDE     | A                           | 854                                      | (5.5)  | 549                                      | (8.6)  | 305                                             | (3.3)  |
| PROMAZINE       | T                           | 666                                      | (4.3)  | 215                                      | (3.4)  | 451                                             | (4.9)  |
| THIORIDAZINE    | T                           | 560                                      | (3.6)  | 212                                      | (3.3)  | 348                                             | (3.8)  |
| SULPIRIDE       | T                           | 472                                      | (3.0)  | 303                                      | (4.8)  | 169                                             | (1.8)  |
| ZUCLOPENTHIXOL  | T                           | 365                                      | (2.3)  | 256                                      | (4.0)  | 109                                             | (1.2)  |
| LEVOMEPRMAZINE  | T                           | 354                                      | (2.3)  | 90                                       | (1.4)  | 264                                             | (2.9)  |
| PERICYAZINE     | T                           | 245                                      | (1.6)  | 77                                       | (1.2)  | 168                                             | (1.8)  |
| CLOZAPINE       | A                           | 146                                      | (0.9)  | 129                                      | (2.0)  | 17                                              | (0.2)  |
| FLUPHENAZINE    | T                           | 122                                      | (0.8)  | 77                                       | (1.2)  | 45                                              | (0.5)  |
| PERPHENAZINE    | T                           | 65                                       | (0.4)  | 19                                       | (0.3)  | 46                                              | (0.5)  |
| PIPOTIAZINE     | T                           | 43                                       | (0.3)  | 36                                       | (0.6)  | 7                                               | (0.1)  |
| PALIPERIDONE    | T                           | 41                                       | (0.3)  | 33                                       | (0.5)  | 8                                               | (0.1)  |
| DROPERIDOL      | T                           | 23                                       | (0.1)  | 18                                       | (0.3)  | 5                                               | (0.1)  |
| PIMOZIDE        | T                           | 19                                       | (0.1)  | 15                                       | (0.2)  | 4                                               | (0.1)  |
| BENPERIDOL      | T                           | 14                                       | (0.1)  | 7                                        | (0.1)  | 7                                               | (0.1)  |
| LURASIDONE      | A                           | 7                                        | (0.1)  | 6                                        | (0.1)  | 1                                               | (0.1)  |
| ASENAPINE       | A                           | 5                                        | (0.1)  | 3                                        | (0.1)  | 2                                               | (0.1)  |
| ZOTEPINE        | A                           | 5                                        | (0.1)  | 4                                        | (0.1)  | 1                                               | (0.1)  |
| LOXAPINE        | T                           | 2                                        | (0.1)  | 1                                        | (0.1)  | 1                                               | (0.1)  |
| SERTINDOLE      | A                           | 2                                        | (0.1)  | 2                                        | (0.1)  | 0                                               | (0.1)  |
| OXYPERTINE      | T                           | 1                                        | (0.1)  | 1                                        | (0.1)  | 0                                               | (0.1)  |

Individuals may receive more than one type of antipsychotic so percentages add up to more than 100%. Other antipsychotics considered but which were not prescribed to anyone in the cohort: Chlorprothixene, Fluspirilene, Remoxipride, Thiopropazate, Thioproperazine, Trifluoperidol.

**Appendix Table 3 Proportions of cohort with repeat prescriptions and at least 6 months, 1 year, 3 years and 5 years continuous antipsychotic use**

|                                                       | Total present<br>for time period | With length of<br>antipsychotic<br>use, n (%) | Total with<br>recorded SMI<br>present for<br>time period | With length of<br>antipsychotic<br>use, n (%) | Total with no<br>recorded SMI<br>present for time<br>period | With length of<br>antipsychotic<br>use, n (%) |
|-------------------------------------------------------|----------------------------------|-----------------------------------------------|----------------------------------------------------------|-----------------------------------------------|-------------------------------------------------------------|-----------------------------------------------|
| <b>At least two prescriptions ≤ 84 days<br/>apart</b> | 46210                            | 13898 (30.1)                                  | 9335                                                     | 5973 (64.0)                                   | 36875                                                       | 7925 (21.5)                                   |
| <b>≥6 months continuous use</b>                       | 40850                            | 11906 (29.1)                                  | 8281                                                     | 5358 (64.7)                                   | 32569                                                       | 6548 (20.1)                                   |
| <b>≥1 year continuous use</b>                         | 35794                            | 9588 (26.8)                                   | 7218                                                     | 4591 (63.6)                                   | 28576                                                       | 4997 (17.5)                                   |
| <b>≥3 year continuous use</b>                         | 24081                            | 5492 (22.8)                                   | 4741                                                     | 2954 (62.3)                                   | 19340                                                       | 2538 (13.1)                                   |
| <b>≥5 year continuous use</b>                         | 17588                            | 3529 (20.1)                                   | 3385                                                     | 2044 (60.4)                                   | 14203                                                       | 1485 (10.5)                                   |
